# Supplementary material for: Functional and structural analysis of AT-specific minor groove binders that disrupt DNA–protein interactions and cause disintegration of the Trypanosoma brucei kinetoplast
Source: PubMed Central journal article supplement (PMC5737332; doi:10.1093/nar/gkx521), 2017-06-16
Supplement: gkx521_supp.pdf [file gkx521_supp.pdf]

## **SUPPLEMENTARY DATA**

### **Functional and structural analysis of AT-specific minor groove binders that disrupt DNA-protein interactions and cause disintegration of the *Trypanosoma brucei* kinetoplast**

Cinthia R. Millan, Francisco J. Acosta-Reyes, Laura Lagartera, Godwin U. Ebiloma, Leandro Lemgruber, J. Jonathan Nué Martínez, Núria Saperas, Christophe Dardonville, Harry P. de Koning, and J. Lourdes Campos

**This file contains nine supplementary figures and one supplementary table.**

*Trypanosoma brucei brucei* strain Lister 427 (Tb427WT) minicircle, complete sequence;  
kinetoplast [1]

LOCUS: KF293288 1001 bp DNA circular

GGGGTTGGTGTAAACACACAGGG**TTT**TCCCGTAG**AATT**ATATT**AATTT**GGATC**TTT**GGTG  
**TTTT**CTATTGAT**AAA**AGAATAAGATAATAGATAGATT**AATT**GATATTATATAGATATTATATATA  
AGACGCATATAAGTGAGTCTATATACAGATAATGATGAT**AATT**TATATATATGTTAACTTTAAT  
**ATTTATTTATTTT****CTTT**CTATATTAGGAG**AAA**TGTGATAATAGATAAGTAATGAGAGT**AAT**  
**TTAG**ATATTT**AATT**GATAT**AATT**ACACACACAGATACGTGATATATAGAGTGTAAAGATAATA  
TGATGTATATATATG**TAAAT****AAAAA**CTATTTATTTTATGTTAAGTAGATGGAG**AAATAAT**  
AGTTAAATAAGAGGTAGTACT**TTT**GAGGAGGTATAAGGTAATATTAACATTGAGAATCTTAGAT  
AACTGAT**AAA**AACTGTTA**TTT**CTGCATCT**AAA**AGAGGGT**TTT**AAGCTGTCT**AAA**AGGGT**AA**  
**AATGAGGTAATAGATAAGGTATAGATAATATAATATTTAATATAATATATATAATAACAATAGC**  
AGGT**AAAGGTAAGAAA**GTGAAGATATCATATAAGATTG**TATATTTAATGTTAAACTATATTTA**  
**TTATTTTATTTAT****AATT**AGTAGATAAGATTAGTAGAAGTGAAGTAGT**AATT**GT**AAA**ACTGATAG  
TAAGATGGGAATAAGGTGTGAGATAT**AAA**TAG**AAA**GGTTAAGTT**AATT**GTAGTTAT**AATT**GGA  
AGTGCAG**AAA**GTGTTGTAGATGGAGTATTAGGTTGATTAGAGAGAGAGTAGTAT**AAA**GTGT**A**  
**AAAAGTTT**GTGTTGGATGGTAGAGATAGAAGGGAGAAGTTAG**AAATT**CAGAGA**AAATT**GGG  
GAA**AAATCAGGGAAA**TCCGGGCTGAA**AAACCGAAA**TCTTATGGGCGTGCAGAT**TTT**CACCA  
TACAC**AAATCACGTGCTATTT**TCGGGGGTT**TTT**AGGTCCGAGGTACTTCG**AAA**.

**Figure S1.** The **AT content** represents the **73.6%** of the minicircle genome of Tb427WT (**A = 394** and **T = 342**); and **CG-content** the **26.5%** (**G = 206** and **C = 59**). The sequence **AAA** appears **28** times and the sequence **TTT** **26** times; both are shown in red, bold font. The sequence **AATT** exists **14** times and is highlighted in yellow. Tracts with more than 10 **A** or **T** are found 15 times (red and underlined).

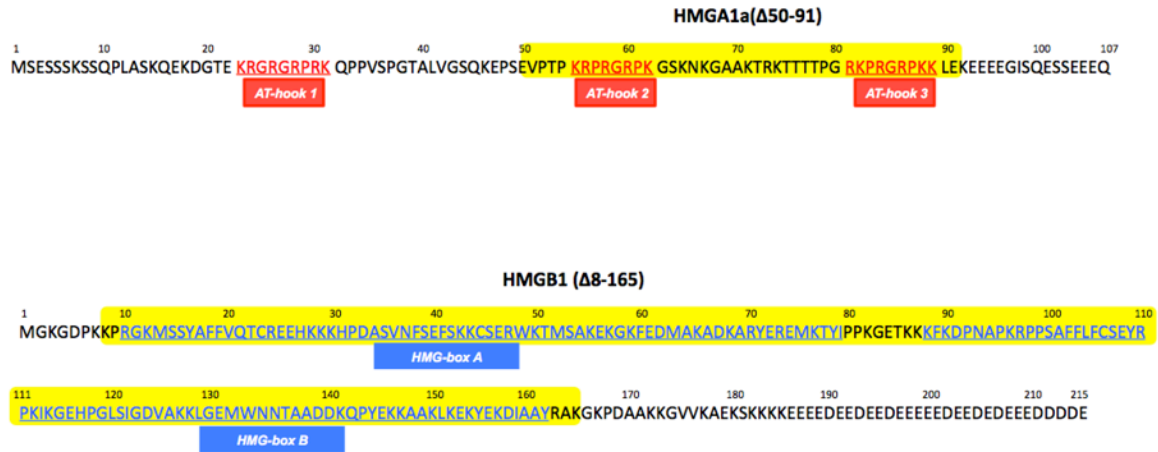

**Figure S2.** Full sequences of the HMG human proteins HMGA1a (top) and HMGB1 (bottom). AT-hook domains are indicated in red and HMG-box domains in blue. In both cases, the fragments used in our study [HMGA1a(Δ50-91) and HMGB (Δ7-164)] are highlighted in yellow.

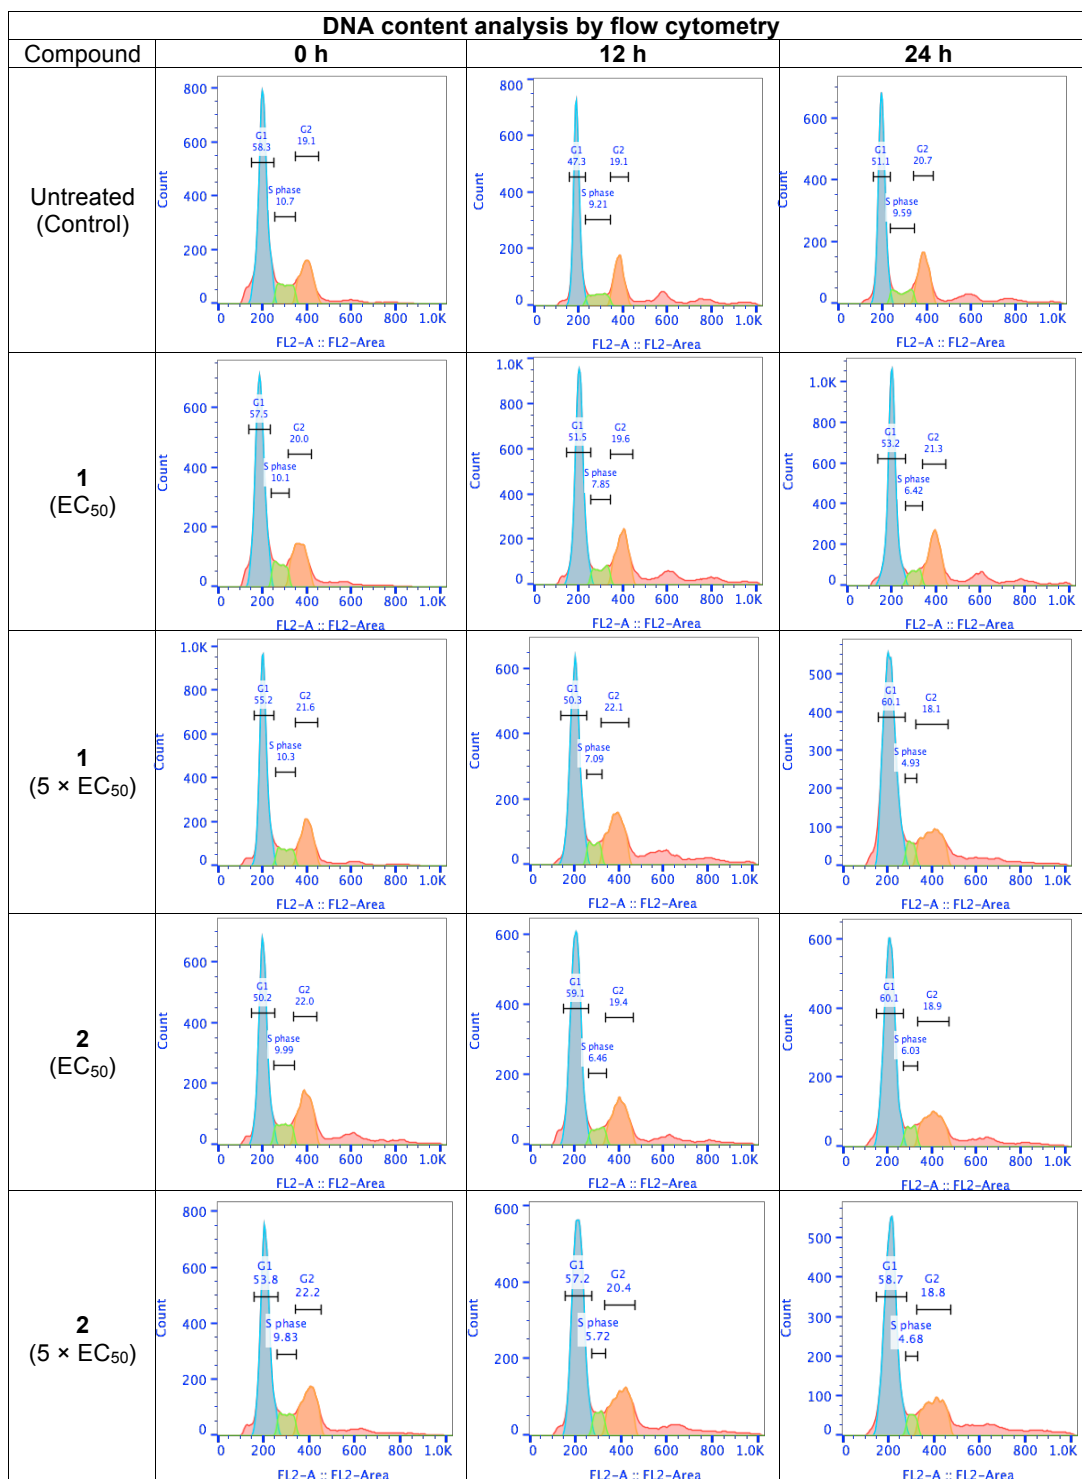

**Figure S3.** Flow cytometry analysis of the DNA content of bloodstream-form *T. b. brucei* s427 WT untreated and treated with the bisimidazolium diphenyl compounds **1** and **2**. Results from one of three independent experiments that produced similar results are shown. Percentage of the population at each cell cycle phase is shown above its appropriate histogram peak. G1: all cells have one kinetoplast and one nucleus; G2: all cells have two kinetoplast and two nucleus; S phase: DNA synthesis. Untreated cells as control were included in each assay.

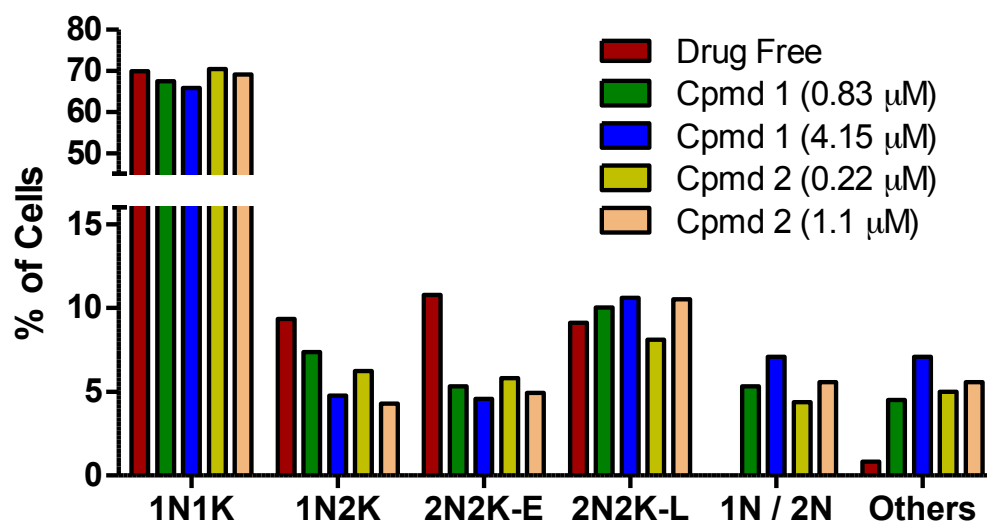

**Figure S4.** DNA content of cells treated 8 h with compounds 1 and 2 at 1× and 5× EC<sub>50</sub> as determined by fluorescence microscopy (N, nucleus; K, kinetoplast; 1N/2N, cells with one or two nuclei but no observable kinetoplastid).

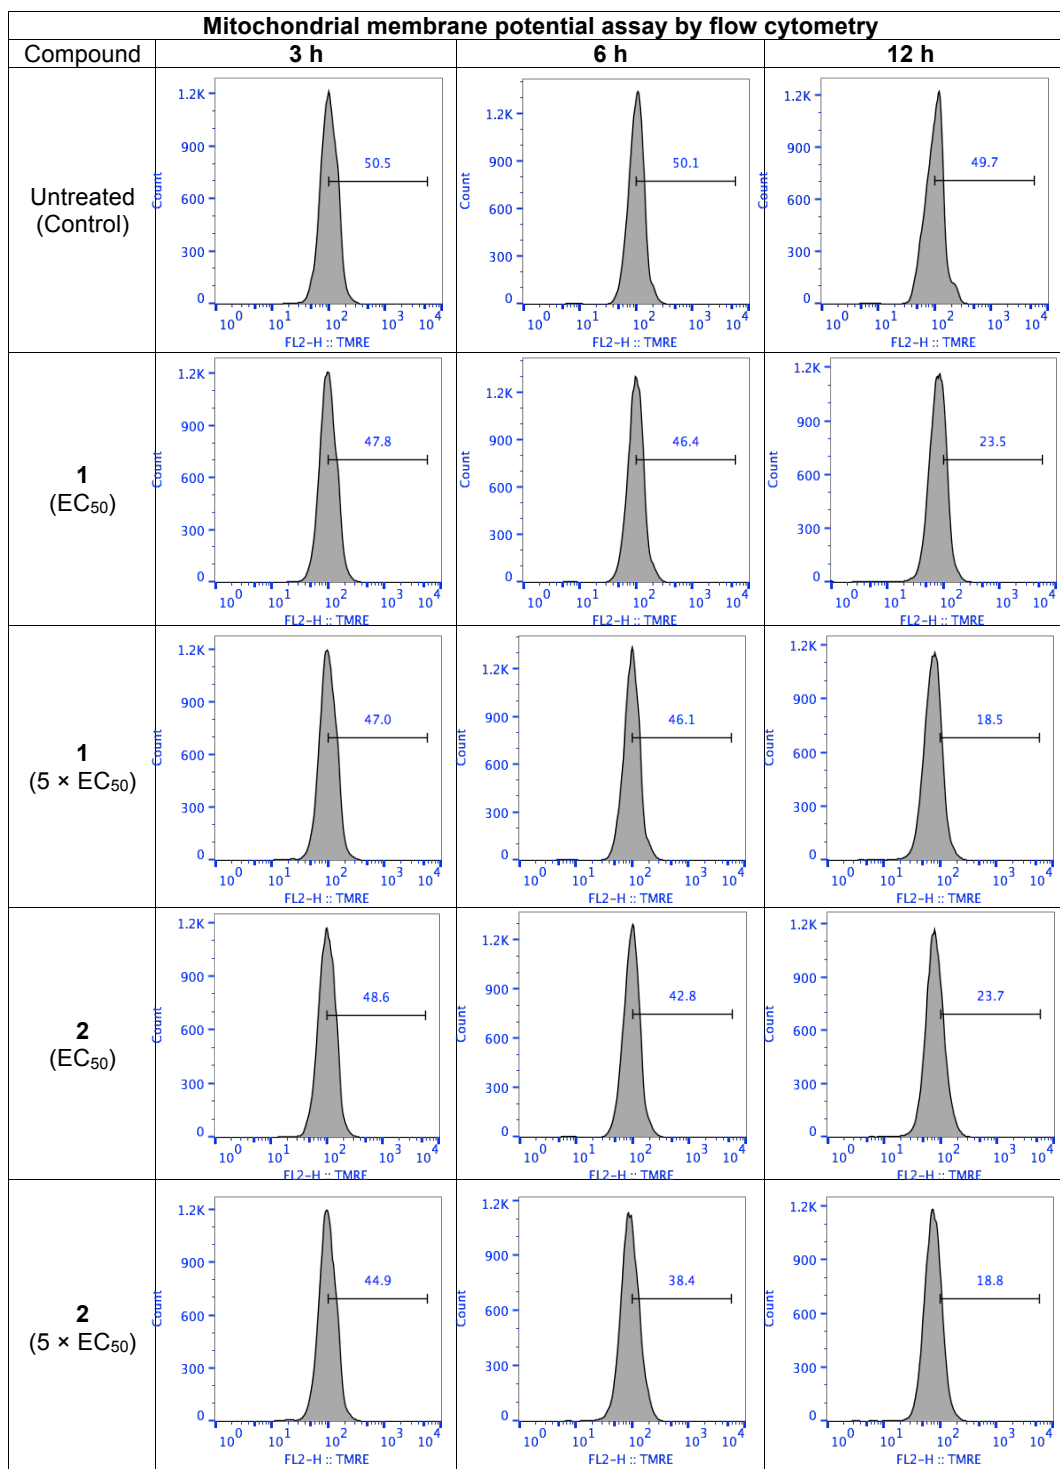

**Figure S5.** Histograms of TMRE-associated fluorescence after incubation with or without compounds **1** and **2**. One of three independent determinations is shown. Values are given as the percentage of cells with fluorescence above  $1 \times 10^2$  arbitrary units (AU), equivalent to approximately 50% for the untreated cells. Samples are taken by a BD FACSCalibur™ using the FL2-height detector. Data were processed with CellQuest™ and ©FlowJo software.

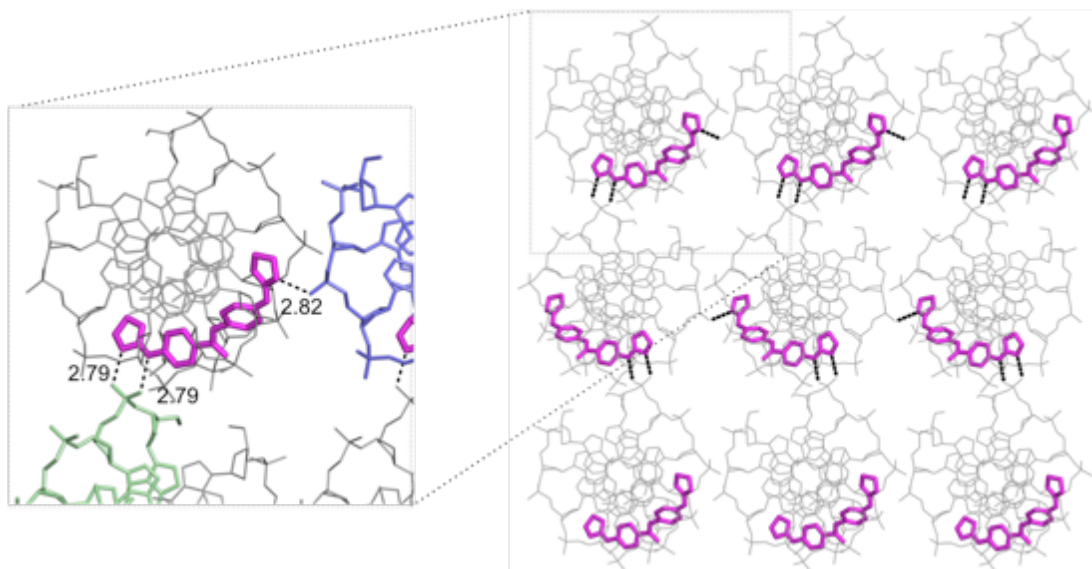

**Figure S6.** Packing of a layer of A-B duplexes. An enlarged view of the interactions of drug F with the neighbouring phosphates of symmetrical DNA chains is shown at the left.

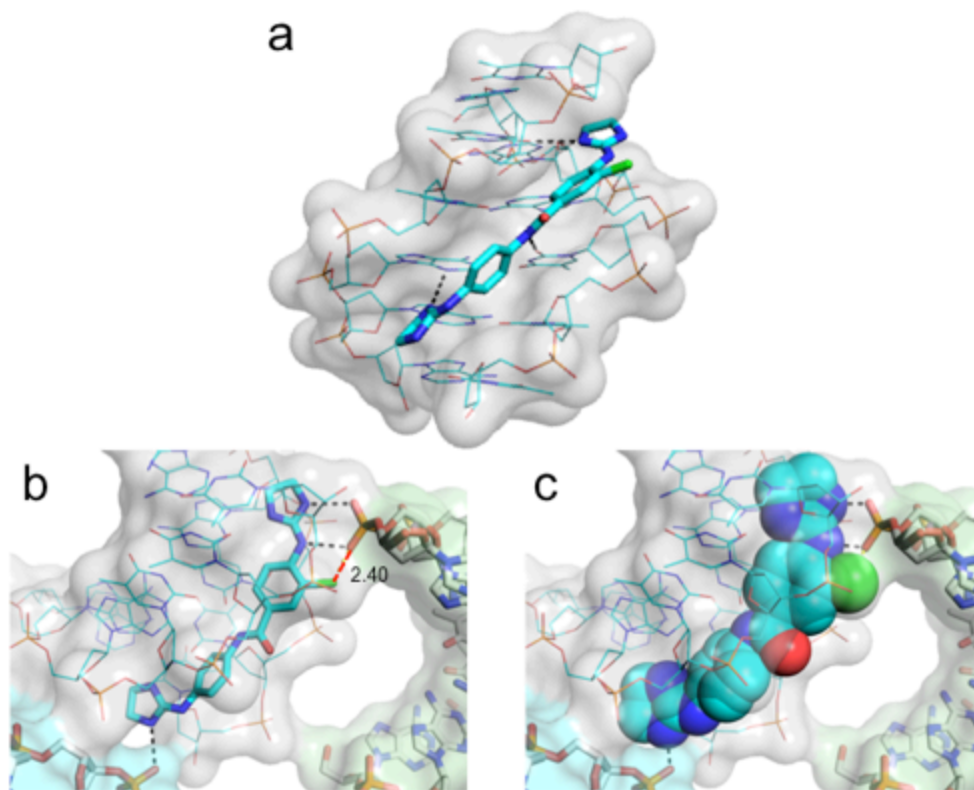

**Figure S7.** Structural effect of adding chlorine to compound 1. (a) It is clear that chlorine can be added to compound 1 without any direct influence on the interaction with DNA. (b, c) However the chlorine atom alters the interaction with the phosphate of neighboring DNA molecule, since the 2.4 Å distance is too short [red dotted line in (b)]. Chlorine atom is shown in green.



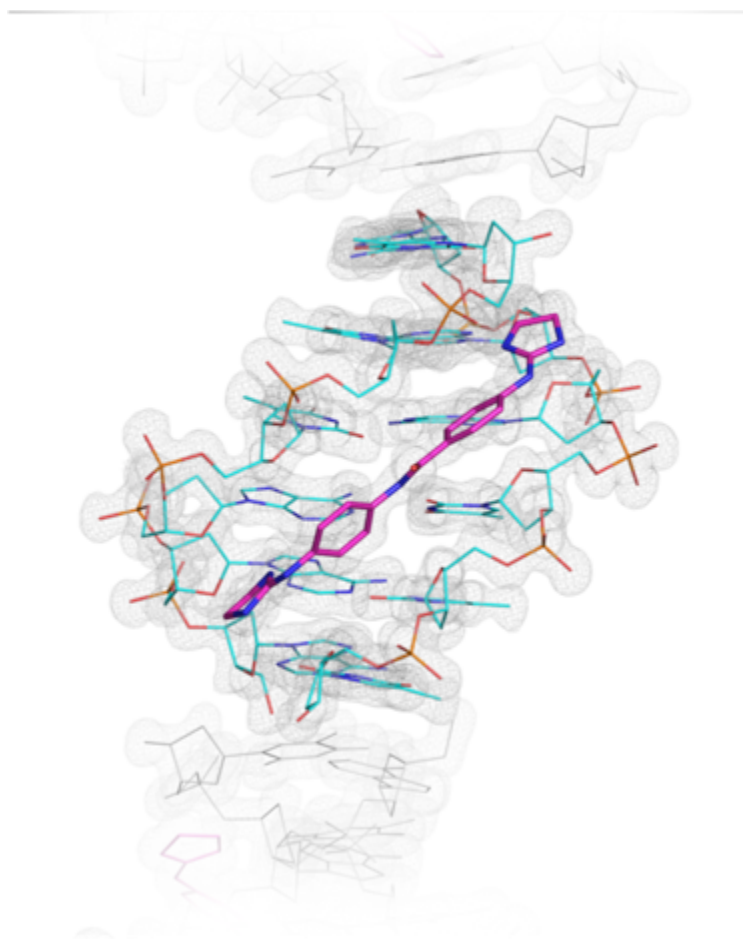

**Figure S8.** Electron density map ( $2F_o - F_c$  at 1s level) of the compound **1** drug F, in the minor groove of the all-AT DNA duplex.

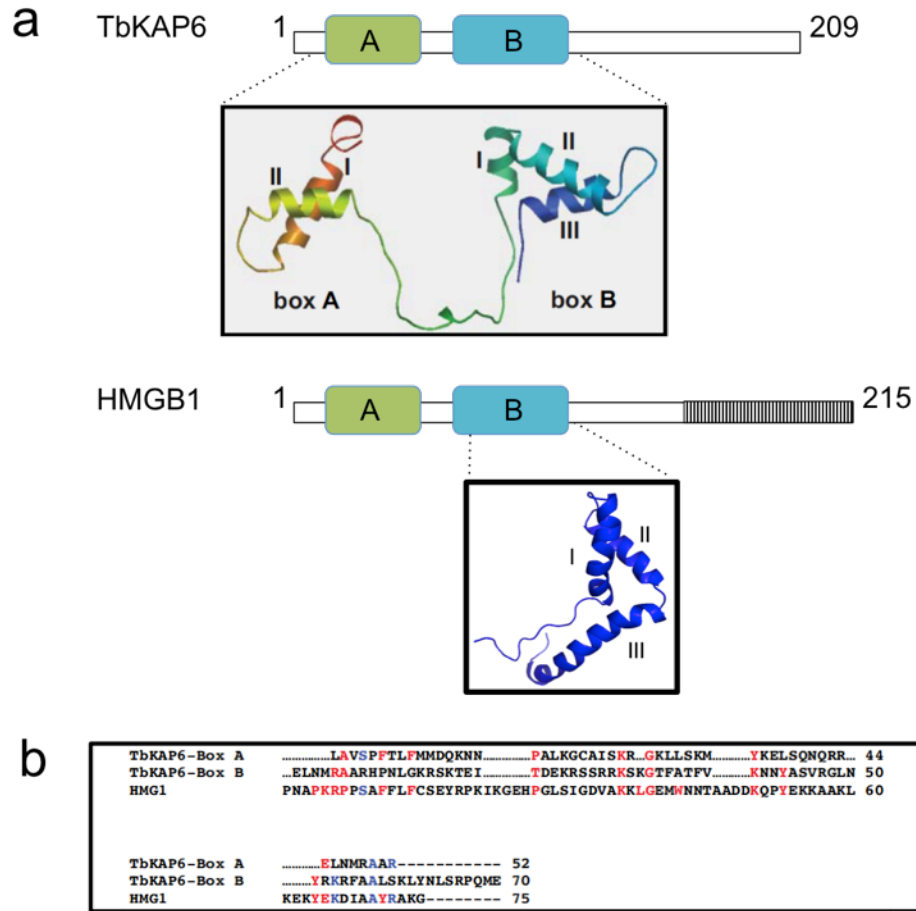

**Figure S9.** The HMG box-containing proteins HMGB1 and TbKAP6. **(a)** Schematic comparison of two tandem HMG-boxes in TbKAP6 with those of human HMGB1. HMG-box A: green box; HMG-box B: blue box; C-terminal acidic tails: hatched lines. Structure comparison (below each diagram) of the HMG boxes A and B of TbKAP6 constructed by SWISS-MODEL workspace (<http://swissmodel.expasy.org/>) and the HMG-box B (blue; PDB ID: 1HME) as determined by NMR microscopy [2]. **(b)** Alignment of the two HMG boxes of TbKAP6 and the human HMGB1 box B (as HMG-1). Figure adapted from Wang et al., 2014 [3].

**Table S1.** Hydrogen bonds formed by compound **1** in the minor groove of d[AAATTT]<sub>2</sub> and interactions with neighbouring phosphates.

| Atoms involved            | Drug E | Drug F | Drug G |
|---------------------------|--------|--------|--------|
| O2(T4)-N3(6XV)            | 3.32   | 3.07   | 3.30   |
| O2(T5)-N22(6XV)           | --     | 2.9    | --     |
| N3(A3)-N13(6XV)           | --     | 3.05   | --     |
| O2(T5)-N25(6XV)           | 2.94   | --     | 2.87   |
| O2(T5')-N13(6XV)          | 3.09   | --     | 3.05   |
| N10(6XV)-OP1(A3 oligo B') | --     | 2.82   | --     |
| N20(6XV)-OP2(A2 oligo A') | --     | 2.79   | --     |
| N25(6XV)-OP1(A2 oligo A') | --     | 2.79   | --     |

**Values are given in Å.**

## REFERENCES

1. Dean,S., Gould,M.K., Dewar,C.E., and Schnauffer,A.C. (2013) Single point mutations in ATP synthase compensate for mitochondrial genome loss in trypanosomes. *Proc. Natl. Acad. Sci. U.S.A.*, **110**(36), 14741–14746.
2. Weir,H.M., Kraulis,P.J., Hill,C.S., Raine,A.R., Laue,E.D., and Thomas,J.O. (1993) Structure of the HMG box motif in the B-domain of HMG1. *EMBO J.*, **12**, 1311–1319.
3. Wang,J., Pappas-Brown,V., Englund,P.T. and Jensen,R.E. (2014) TbKAP6, a Mitochondrial HMG Box-Containing Protein in *Trypanosoma brucei*, Is the First Trypanosomatid Kinetoplast-Associated Protein Essential for Kinetoplast DNA Replication and Maintenance. *Eukaryot. Cell*, **13**, 919–932.
